# Supplementary material
Source: publisher figshare collection journal article supplement (https://geolsoc.figshare.com/ndownloader/files/36692748)
Supplement: Supplementary file 1 [file 36692748]

## Sheet: Utah San Rafael
Flask	Type	Bubbled	Date	Days	Hours	pH	Al	As	Ba	Ca	Cd	Cr	Cu	Fe	Hg	K	Li	Mg	Mn	Ni	Pb	Sr	U	V	Zn
		CO2					μg/L	μg/L	μg/L	μg/L	μg/L	μg/L	μg/L	μg/L	μg/L	μg/L	μg/L	μg/L	μg/L	μg/L	μg/L	μg/L	μg/L	μg/L	μg/L
Entrada S1	Grain	N	2014-04-16 11:00:00	0	0	7.71	233.9	0	10.7722	1158184	0	1.299	4.84658	24.47	0	325078	3172.9	251220	1613.1	0	0.5559	14397.8	5.429	0	37.2
Entrada S1	Grain	N	2014-04-17 15:30:00	1.1875	28.5	7.05	235.3	0	11.9922	858184	0	1.963	12.2726	13.22	0	352478	3456.9	305420	319.103	0	0.5458	12347.8	9.019	1.947	28.67
Entrada S1	Grain	N	2014-04-18 14:30:00	2.14583	51.5	6.76	386.2	0	12.1722	845284	0	0	5.32558	8.992	0	348878	3523.9	317420	198.303	0	0	12377.8	11.06	2.213	33.8
Entrada S1	Grain	N	2014-04-22 16:00:00	6.20833	149	6.9	353.4	0	12.0522	526784	0	0.9193	13.4926	73.43	0	342778	3363.9	313020	43.0132	0	0	9754.76	12.68	2.035	43.96
Entrada S1	Grain	N	2014-05-02 15:15:00	16.1771	388.25	7.33	275.6	0	8.08221	264184	0	1.647	7.71858	0	0	347778	3550.9	306120	6.16619	0	0.7691	5769.76	8.236	1.547	33.7
Entrada S1	Grain	N	2014-05-23 12:30:00	37.0625	889.5	7.8	343.5	0	5.33021	83684	0	2.658	8.68758	0	0	342578	3528.9	296020	2.61819	0	0	2017.76	3.932	1.369	26.9
Entrada S1	Grain	Y	2014-07-07 11:30:00	82.0208	1968.5	8.77	291.8	0	12.1222	7974	0	2.816	18.3326	57.31	0	344278	3514.9	285520	4.15519	0	1.011	299.362	3.89	4.167	30.62
Entrada S1	Grain	Y	2014-07-07 13:00:00	82.0833	1970	6.13	245.5	0	24.4322	144684	0	0	8.15558	32.32	0	342178	3401.9	284620	213.003	0	0	2594.76	5.626	4.256	34.16
Entrada S1	Grain	Y	2014-07-07 15:00:00	82.1667	1972	6.28	253.6	0	38.0322	319684	0	0	10.9626	16.87	0	319778	3258.9	276420	550.003	0	0.8437	5248.76	8.328	3.368	38.82
Entrada S1	Grain	Y	2014-07-07 19:00:00	82.3333	1976	6.31	227	0	44.5822	407184	0	0	6.86758	9.144	0	321178	3277.9	277520	659.303	0	0	6726.76	10.3	3.679	33.95
Entrada S1	Grain	Y	2014-07-08 01:00:00	82.5833	1982	6.31	249.4	0	48.3822	444584	0	0.9509	5.36758	0	0	312778	3113.9	269120	685.603	0	0	7434.76	11.07	3.901	37
Entrada S1	Grain	Y	2014-07-08 13:00:00	83.0833	1994	6.4	319.2	0	49.9422	505184	0	1.488	6.21858	0	0.798469	321678	3157.9	280720	630.703	0	0.8814	7822.76	12.11	3.412	33.07
Entrada S1	Grain	Y	2014-07-09 14:30:00	84.1458	2019.5	6.32	405.1	0	49.9222	452584	0	1.362	18.1426	15.46	0	324878	3224.9	280820	553.903	0	0.8695	7893.76	13.69	3.99	50.33
Entrada S1	Grain	Y	2014-07-15 14:30:00	90.1458	2163.5	6.41	71.95	0	41.2022	495284	0	1.236	48.5026	5.802	0	344278	3290.9	302320	470.403	0	1.677	8387.76	14.76	2.524	119.2
Entrada S1	Grain	Y	2014-07-22 15:00:00	97.1667	2332	6.45	0	0	33.6222	506784	0	0	0	0	0	360478	3508.9	318320	443.703	0	0	8916.76	16.36	2.568	0
Entrada S1	Grain	Y	2014-08-06 13:00:00	112.083	2690	6.45	0	0	29.6922	487384	0	0	0	5.976	0	392878	3886.9	351620	377.603	1.89378	0	8734.76	18.26	3.457	22.66
Entrada S1	Grain	Y	2014-09-03 14:00:00	140.125	3363	6.46	0	0	22.8622	541084	0	0	0	7.148	0	424078	4134.9	385220	394.903	7.45978	0	9111.76	20.15	3.679	50.21
Entrada S1	Grain	Y	2014-09-29 14:30:00	166.146	3987.5	6.47	0	0	23.1022	588284	0	0	4.82558	45.78	0	522078	5122.9	483120	370.103	5.50878	1.179	9881.76	23.26	3.679	0
Entrada S2	Grain	N	2014-04-16 11:00:00	0	0	7.71	366.2	0	11.1022	1326184	0	1.141	5.26158	28.42	0	341478	3196.9	260320	1859.1	0	1.061	16677.8	5.339	0	37.77
Entrada S2	Grain	N	2014-04-17 15:30:00	1.1875	28.5	6.82	355.5	0	16.9622	937384	0	0	40.2226	16.78	0	351778	3481.9	282920	625.103	0	0	13167.8	5.364	1.325	30.09
Entrada S2	Grain	N	2014-04-18 14:30:00	2.14583	51.5	6.92	352.3	0	13.3322	700484	0	0	11.1826	9.774	0	353878	3422.9	279520	329.103	0	0	11297.8	4.883	0.9695	46.46
Entrada S2	Grain	N	2014-04-22 16:00:00	6.20833	149	6.99	279.1	0	18.5822	584684	4.0497	9.298	11.9526	12.14	0	343478	3452.9	280220	106.603	4.72578	5.494	10517.8	4.775	0	36.43
Entrada S2	Grain	N	2014-05-02 15:15:00	16.1771	388.25	7.28	253.8	0	11.4122	310684	0	0	7.72958	0	0	348978	3461.9	278720	11.6232	0	0	7009.76	3.587	0.9251	32.98
Entrada S2	Grain	N	2014-05-23 12:30:00	37.0625	889.5	7.93	479.1	0	10.3822	72144	0	0	16.2726	6.301	0	344778	3545.9	269420	3.75419	0	0	1923.76	1.197	1.014	56.01
Entrada S2	Grain	Y	2014-07-07 11:30:00	82.0208	1968.5	8.83	207.8	0	11.0022	7944	0	0	7.95258	0	2.09947	356178	3452.9	266920	1.61919	0	11.32	197.962	0.8798	2.391	26.38
Entrada S2	Grain	Y	2014-07-07 13:00:00	82.0833	1970	6.09	340.3	0	25.2622	75684	0	0	10.4326	0	1.82047	338078	3392.9	257220	61.1032	0	0	1730.76	1.416	3.323	37.97
Entrada S2	Grain	Y	2014-07-07 15:00:00	82.1667	1972	6.17	366.8	0	36.3322	192484	0	1.33	9.54258	12.9	1.38747	329478	3236.9	252620	215.403	0	0	3943.76	2.149	2.169	44.96
Entrada S2	Grain	Y	2014-07-07 19:00:00	82.3333	1976	6.26	364.6	0	42.8122	337484	0	1.046	6.12258	18.48	1.00047	318878	3153.9	245320	404.003	0	0.3359	5803.76	2.917	2.435	35.39
Entrada S2	Grain	Y	2014-07-08 01:00:00	82.5833	1982	6.26	412.4	0	45.3922	362884	0	0	8.45358	0	0.941469	317278	3091.9	244020	472.703	0	0	6719.76	3.296	1.947	36.27
Entrada S2	Grain	Y	2014-07-08 13:00:00	83.0833	1994	6.29	201.4	0	49.1722	357584	0	0	4.47358	0	1.62247	323778	3154.9	251520	442.303	0	0	6572.76	4.008	2.08	29.85
Entrada S2	Grain	Y	2014-07-09 14:30:00	84.1458	2019.5	6.34	368.5	0	49.1722	487784	0	0	15.4226	53.81	0.479469	330778	3133.9	258320	511.303	0	4.07	8419.76	4.89	2.213	51.91
Entrada S2	Grain	Y	2014-07-15 14:30:00	90.1458	2163.5	6.37	0	0	37.7222	481984	0	0	4.56958	0	0	330878	3214.9	267320	453.403	0	0.3773	9299.76	5.21	1.192	22.35
Entrada S2	Grain	Y	2014-07-22 15:00:00	97.1667	2332	6.34	0	0	29.9322	476184	0	0	0	0	0	342778	3272.9	280220	401.403	0	0	8902.76	5.612	1.947	0
Entrada S2	Grain	Y	2014-08-06 13:00:00	112.083	2690	6.41	0	0	24.8522	521484	0	0	3.55858	12.14	0	374578	3660.9	308120	383.703	0	0.1854	9729.76	6.151	2.213	22.99
Entrada S2	Grain	Y	2014-09-03 14:00:00	140.125	3363	6.39	0	0	19.6322	576384	0	0	0	10.43	0	402078	3799.9	331420	397.003	2.69078	0.8225	10257.8	6.649	2.213	0
Entrada S2	Grain	Y	2014-09-29 14:30:00	166.146	3987.5	6.42	115.3	0	20.9822	658684	0	0	6.28258	174.1	0	447978	4397.9	378320	387.803	2.87878	1.846	12547.8	7.241	2.035	20.38
Wingate S3	Grain	N	2014-04-16 11:00:00	0	0	7.71	307	0	11.1322	1271184	0	1.394	6.41058	28.46	0	350578	3336.9	266420	1889.1	0	0.6452	17027.8	5.287	0	35.09
Wingate S3	Grain	N	2014-04-17 15:30:00	1.1875	28.5	6.88	312.9	0	13.7722	987184	0	0	6.83558	18.69	0	357378	3451.9	276020	921.303	9.57978	0	13847.8	4.767	3.812	51.08
Wingate S3	Grain	N	2014-04-18 14:30:00	2.14583	51.5	7.22	220.5	0	9.47221	708784	0	0	5.83558	8.927	0	353678	3422.9	269820	491.703	0	0	11257.8	4.087	4.212	26.32
Wingate S3	Grain	N	2014-04-22 16:00:00	6.20833	149	7.07	259.9	0	8.27221	468784	0	0	6.70858	8.819	0	351778	3532.9	265420	146.703	0	0	8024.76	2.775	4.389	33.46
Wingate S3	Grain	N	2014-05-02 15:15:00	16.1771	388.25	7.31	371.2	0	8.71221	234484	0	0	7.05958	0	0	350478	3497.9	263520	40.9432	0	0	3694.76	1.014	1.902	32.78
Wingate S3	Grain	N	2014-05-23 12:30:00	37.0625	889.5	8.04	639	0	10.4422	55874	0	0.9193	20.0426	5.412	0	357878	3487.9	264720	14.3032	0	4.075	830.662	0.2509	1.902	44.74
Wingate S3	Grain	Y	2014-07-07 11:30:00	82.0208	1968.5	9.03	292	0	12.9022	4544	0	0	9.61258	0	0	363078	3632.9	266520	1.24619	0	0	36.322	0.2797	5.811	28.21
Wingate S3	Grain	Y	2014-07-07 13:00:00	82.0833	1970	6.21	309.8	0	31.9322	59064	0	0	21.7926	0	0	345978	3442.9	254320	46.2732	0	1.093	896.762	0.3995	4.301	70.61
Wingate S3	Grain	Y	2014-07-07 15:00:00	82.1667	1972	6.17	286.7	0	46.0822	180384	0	1.425	7.86758	0	0	334278	3299.9	248320	138.803	0	0	2680.76	1.022	4.301	51.61
Wingate S3	Grain	Y	2014-07-07 19:00:00	82.3333	1976	6.27	331.1	0	55.5122	308384	0	1.299	8.81458	10.66	0	325378	3180.9	239720	269.003	0	0	4804.76	1.589	4.301	42.86
Wingate S3	Grain	Y	2014-07-08 01:00:00	82.5833	1982	6.26	276.8	0	59.7122	327784	0	0	12.8626	10.19	4.00447	324378	3175.9	241420	285.503	0	0.6457	5019.76	2.036	0.8806	51
Wingate S3	Grain	Y	2014-07-08 13:00:00	83.0833	1994	6.3	367.2	0	63.1122	496884	0	0	9.66258	5.021	0.166969	327878	3102.9	244120	399.803	0	0	7257.76	2.439	3.146	45.22
Wingate S3	Grain	Y	2014-07-09 14:30:00	84.1458	2019.5	6.35	77.52	0	63.9322	434784	0	1.235	30.8826	11.29	0	341478	3265.9	249320	364.003	0	1.7	6930.76	3.307	3.279	97.19
Wingate S3	Grain	Y	2014-07-15 14:30:00	90.1458	2163.5	6.42	146	0	51.1522	510884	0	1.647	4.79358	0	0	366978	3233.9	258320	369.103	0	0	7322.76	3.095	3.501	27.92
Wingate S3	Grain	Y	2014-07-22 15:00:00	97.1667	2332	6.39	80.91	0	45.6522	504084	0	0	28.3426	0	0	366178	3528.9	272220	403.403	0	0.5072	8101.76	3.303	2.568	84.69
Wingate S3	Grain	Y	2014-08-06 13:00:00	112.083	2690	6.38	97.98	0	37.0622	494984	0	0	1.59058	6.301	0	384478	3683.9	285720	406.603	0	0	8143.76	3.394	1.636	25.95
Wingate S3	Grain	Y	41885.6	140.125	3363	6.38	105.4	0	30.4422	627684	0	0	1.89958	22.38	0	407278	3824.9	301920	467.003	3.63478	0.3506	8729.76	3.533	1.769	31.68
Wingate S3	Grain	Y	41911.6	166.146	3987.5	6.42	107.4	0	28.6222	568084	0	0	7.13358	142.1	0	591478	5576.9	440520	450.003	8.03978	1.833	8499.76	3.865	3.013	29.51
Navajo S4	Grain	N	41745.5	0	0	7.71	162.3	0	10.5922	1127184	0	0	3.67658	22.84	0	348278	3309.9	265720	1598.1	0	0	14387.8	5.178	0	28.09
Navajo S4	Grain	N	41746.6	1.1875	28.5	6.86	334.8	0	70.9622	1078184	0	1.836	7.80458	23.47	0	349278	3443.9	272520	935.103	0	0	15217.8	5.071	1.147	32.79
Navajo S4	Grain	N	41747.6	2.14583	51.5	6.86	637.4	0	63.6322	801184	0	0.9825	11.3426	17.87	0	350878	3414.9	270720	498.603	0	0	11907.8	4.839	1.28	42.82
Navajo S4	Grain	N	41751.7	6.20833	149	7.01	143.2	0	57.4722	636384	0	1.077	3.53758	10.66	0	349378	3469.9	270420	167.103	0	0	10467.8	4.07	1.369	24.77
Navajo S4	Grain	N	41761.6	16.1771	388.25	7.34	339.9	0	29.0222	233384	0	0	13.3626	0	0	353378	3481.9	265020	31.9732	0	0	4075.76	1.205	0	45.9
Navajo S4	Grain	N	41782.5	37.0625	889.5	7.96	451.1	0	23.2122	51174	0	0.9825	25.6926	8.385	0	349378	3550.9	262120	27.6832	0	0	887.662	0.2591	0.7474	32.27
Navajo S4	Grain	Y	41827.5	82.0208	1968.5	8.88	378.5	0	15.7922	5514	0	0	12.4426	7.278	0	353878	3510.9	262420	2.24019	0	0	73.842	0.3564	2.346	46.28
Navajo S4	Grain	Y	41827.5	82.0833	1970	6.13	317.7	0	48.2122	80984	0	3.259	10.0026	105.8	0	348478	3493.9	259720	58.6932	0	1.396	1245.76	0.6045	1.28	47.04
Navajo S4	Grain	Y	41827.6	82.1667	1972	6.23	283.6	0	68.9722	172584	0	1.488	4.69758	0	0	326778	3233.9	242720	148.703	0	0	2999.76	1.187	1.458	31.26
Navajo S4	Grain	Y	41827.8	82.3333	1976	6.27	282.5	0	99.9122	313884	0	0	4.04858	6.323	0	324278	3178.9	241520	282.103	0	0	5089.76	2.061	1.014	57.36
Navajo S4	Grain	Y	41828	82.5833	1982	6.39	341.6	0	114.412	408784	0	1.52	9.03258	0	3.84347	323478	3168.9	239020	360.603	0	0	6307.76	2.534	0	40.85
Navajo S4	Grain	Y	41828.5	83.0833	1994	6.31	179	0	131.712	386884	0	2.247	6.49558	0	0	325078	3094.9	243120	354.103	3.76478	1.478	6131.76	3.011	1.103	31.24
Navajo S4	Grain	Y	41829.6	84.1458	2019.5	6.36	72.38	0	141.912	430084	0	0	2.87858	0	0	329478	3133.9	246420	419.903	0	0	7071.76	3.556	0.7918	20.17
Navajo S4	Grain	Y	41835.6	90.1458	2163.5	6.37	62.59	0	134.912	440684	0	0	4.17658	0	0	343278	3347.9	256720	537.603	0	0	7584.76	4.072	0.7474	35.78
Navajo S4	Grain	Y	41842.6	97.1667	2332	6.37	74.02	0	121.312	455984	0	0	0.431579	0	0	349378	3416.9	259920	676.503	2.29978	0	7864.76	4.291	0.5697	0
Navajo S4	Grain	Y	41857.5	112.083	2690	6.36	0	0	105.912	465884	0	0	2.88858	8.689	0	367878	3493.9	273020	911.603	4.59878	0	8180.76	4.523	0.703	21.41
Navajo S4	Grain	Y	41885.6	140.125	3363	6.38	71.48	0	85.0922	537284	0	0	0.803579	12.07	0	397478	3782.9	296520	1506.1	8.73978	0	8638.76	4.911	0.6141	34.26
Navajo S4	Grain	Y	41911.6	166.146	3987.5	6.38	108.3	0	84.9322	559584	0	0	4.51658	177.2	0	432678	4162.9	325420	2241.1	14.0398	1.295	9089.76	5.387	1.103	26.81
						Instrumental Detection Limit (μg/L)	6.22	1.17	0.191	63	0.025	0.09	0.1	0.468	0.043	21.9	0.895	3.36	0.062	0.171	0.033	0.629	0.017	0.051	1.93
						Average blank value (n = 10)	6.2211	1.1744	0.328779	2481.6	0.16173	0.0897975	0.100742	0.46773	0.0520531	0.33223	0.910211	0.0480018	0.0896808	0.257022	0.0330876	1.2238	0.0170352	0.0508391	1.92802
						Uncertainty (%)	33.823	33.8319	8.2735	20.3232	32.6238	10.8664	4.73576	40.6524	18	37.6441	18	10.9941	8.98834	13.2366	17.3776	0.98434	8.49043	2.35681	33.6519
